# Supplementary material
Source: publisher figshare collection journal article supplement (https://frontiersin.figshare.com/ndownloader/files/24497522)

A

HLA class I antigen presentation

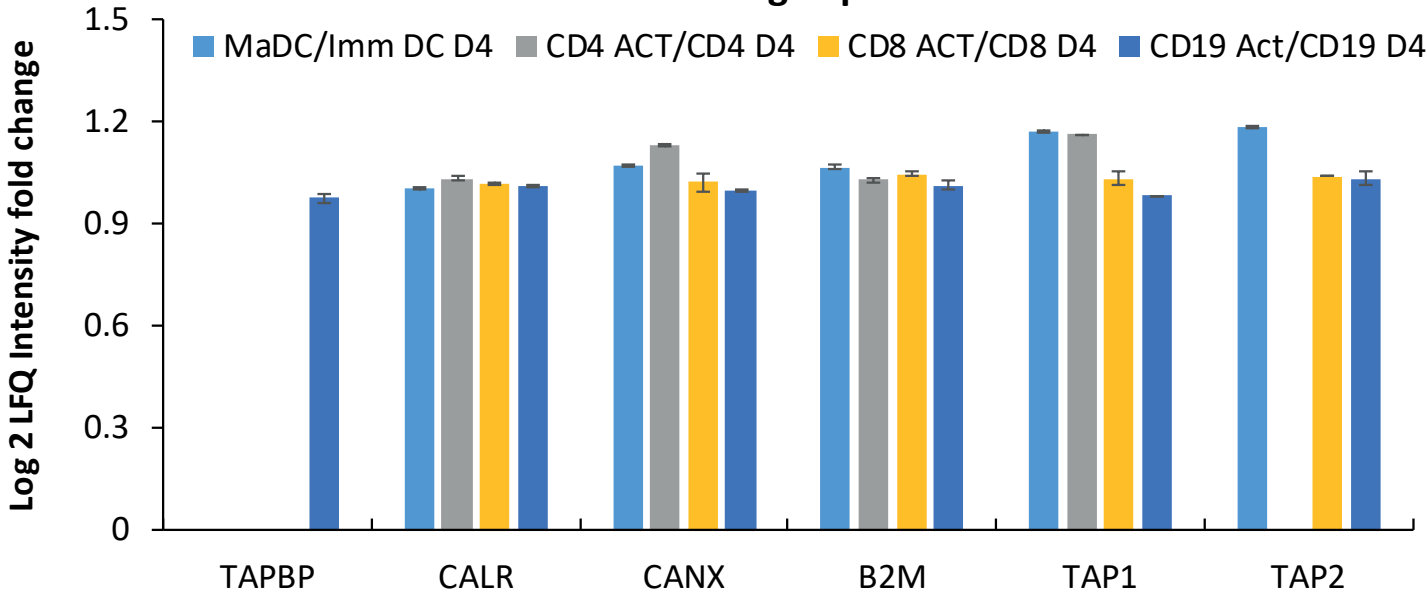

B

HLA class I Donor D4

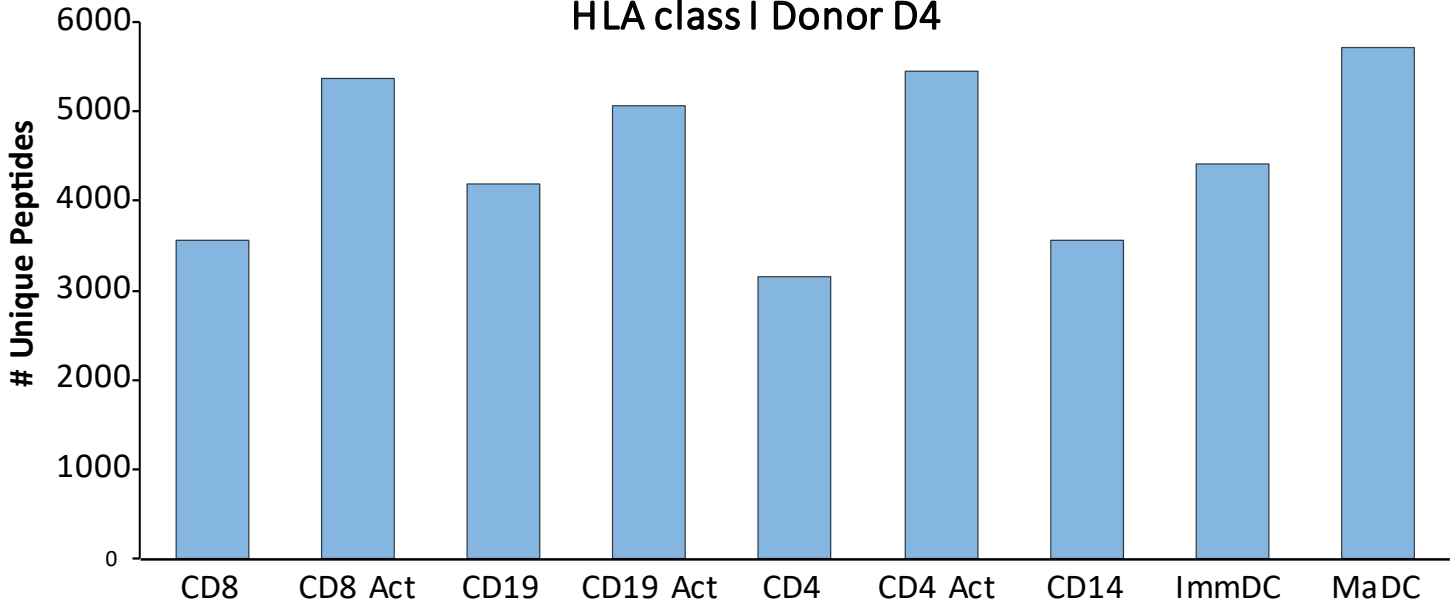

Supplement: Supplementary file [file 24497522]
